## RESEARCH ARTICLE

# Six-month blood pressure and glucose control among HIV-infected adults with elevated blood pressure and hyperglycemia in northern Tanzania: A prospective observational study

Francis M. Sakita<sup>1,2</sup>, Sainikitha Prattipati<sup>3</sup>, Jordan Chick<sup>4</sup>, Linda P. Samu<sup>5</sup>, Amedeus V. Maro<sup>2</sup>, Lauren Coaxum<sup>4</sup>, Sophie W. Galson<sup>3,4</sup>, Dorothy Samuel<sup>6</sup>, Alexander T. Limkakeng<sup>4</sup>, Paige R. O'Leary<sup>4</sup>, Kajiru G. Kilonzo<sup>1,2</sup>, Nathan M. Thielman<sup>3,7</sup>, Gloria Temu<sup>1,2</sup>, Julian T. Hertz<sup>3,4\*</sup>

**1** Kilimanjaro Christian Medical University College, Moshi, Tanzania, **2** Kilimanjaro Christian Medical Center, Moshi, Tanzania, **3** Duke Global Health Institute, Duke University, Durham, North Carolina, United States of America, **4** Department of Emergency Medicine, Duke University School of Medicine, Durham, North Carolina, United States of America, **5** Health Department, Moshi Municipal Council, Moshi, Tanzania, **6** Majengo Health Centre, Moshi, Tanzania, **7** Department of Medicine, Duke University School of Medicine, Durham, North Carolina, United States of America

✉ These authors contributed equally to this work.

\* [julian.hertz@duke.edu](mailto:julian.hertz@duke.edu)

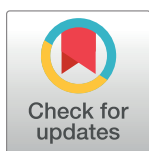

## OPEN ACCESS

**Citation:** Sakita FM, Prattipati S, Chick J, Samu LP, Maro AV, Coaxum L, et al. (2023) Six-month blood pressure and glucose control among HIV-infected adults with elevated blood pressure and hyperglycemia in northern Tanzania: A prospective observational study. *PLoS ONE* 18(5): e0285472. <https://doi.org/10.1371/journal.pone.0285472>

**Editor:** Fredrick Baragi Haraka, Elizabeth Glaser Pediatric AIDS Foundation, UNITED REPUBLIC OF TANZANIA

**Received:** August 23, 2022

**Accepted:** April 25, 2023

**Published:** May 8, 2023

**Copyright:** © 2023 Sakita et al. This is an open access article distributed under the terms of the [Creative Commons Attribution License](https://creativecommons.org/licenses/by/4.0/), which permits unrestricted use, distribution, and reproduction in any medium, provided the original author and source are credited.

**Data Availability Statement:** The minimal data set is within the paper and [Supporting information](#) files.

**Funding:** Duke Center for AIDS Research, an NIH funded program. Grant #: PP30 AI064518. The funders had no role in study design, data collection and analysis, decision to publish, or preparation of the manuscript.

## Abstract

### Background

People with HIV in sub-Saharan Africa are increasingly developing age-related comorbidities. The purpose of this prospective observational study was to describe 6-month outcomes among Tanzanians with HIV and elevated blood pressure or hyperglycemia under current care pathways.

### Methods

Adults presenting for routine HIV care were enrolled and underwent blood pressure and blood glucose measurements. Participants with abnormal blood pressure or glucose were referred for further care, as per current guidelines. Participants' blood pressure and point-of-care glucose were re-evaluated during their 6-month follow-up visit. Elevated blood pressure was defined as systolic  $\geq 140$  mmHg or diastolic  $\geq 90$  mmHg. Hyperglycemia was defined as fasting glucose  $\geq 126$  mg/dl or random glucose  $\geq 200$  mg/dl. An electrocardiogram was obtained at enrollment and at follow-up. Interim myocardial infarction and interim myocardial ischemia were defined as new pathologic Q waves and new T-wave inversions, respectively.

### Results

Of 500 participants, 155 had elevated blood pressure and 17 had hyperglycemia at enrollment. At 6-month follow-up, 7 (4.6%) of 155 participants with elevated blood pressure

**Competing interests:** I have read the journal's policy and the authors of this manuscript have the following competing interests: JTH's and ATL's institution received funding from Abbott Point-of-Care and Roche Diagnostics for studies in which they were co-investigators.

reported current use of an anti-hypertensive medication, 100 (66.2%) had persistent elevated blood pressure, 12 (7.9%) developed interim myocardial infarction, and 13 (8.6%) developed interim myocardial ischemia. Among 17 participants with hyperglycemia, 9 (56%) had persistent hyperglycemia at 6 months and 2 (12.5%) reported current use of an anti-hyperglycemic medication.

## Conclusions

Interventions are needed to improve non-communicable disease care pathways among Tanzanians with HIV.

## Introduction

Globally, hypertension and diabetes mellitus are leading risk factors for cardiovascular diseases (CVDs) such as stroke and myocardial infarction [1, 2]. Human Immunodeficiency Virus (HIV) is an independent risk factor for CVD [3, 4], and therefore people with HIV (PWH) who also have hypertension or diabetes are at particularly heightened risk for cardiovascular complications [5]. In sub-Saharan Africa, where the burden of HIV is greatest, advances in HIV care have resulted in substantially longer life expectancies among PWH [6]. As PWH in SSA live longer, they are increasingly developing age-related comorbidities, such as hypertension and diabetes [7, 8]. The growing burden of hypertension and diabetes among PWH in SSA presents a significant public health threat and portends a looming surge of CVDs among this high-risk population.

Preliminary data from across SSA suggests that the prevalence of hypertension and diabetes among PWH is already substantial. Small, cross-sectional studies from Malawi, Tanzania, South Africa, Ethiopia, and Kenya have reported hypertension prevalence of 13–29% and diabetes prevalence of 6–18% among adults engaged in HIV care [8–15]. Of particular concern, these preliminary studies also found that large proportions of patients with hypertension and diabetes were unaware of their condition and were not currently taking any anti-hypertensive or anti-hyperglycemic therapy. A recent study among PWH in Malawi, for example, found that 60% of adults with hypertension and 83% of those with diabetes had never been diagnosed with these conditions [8]. Multiple recent studies have investigated the feasibility of integrating HIV and non-communicable disease care, but integrated care models are not currently widespread in SSA [16]. In Tanzania, for example, current care guidelines call for siloed care between HIV and other chronic conditions [17]; therefore, PWH in Tanzania who are noted by their HIV provider to have elevated blood pressure or hyperglycemia would be referred to a separate facility for further management under current care processes. Little is known about the effectiveness of this partitioned referral system.

Moreover, despite a growing recognition of the substantial burden of poorly controlled noncommunicable comorbidities among PWH in SSA, few prospective studies report longitudinal outcomes of PWH with hypertension or diabetes. Indeed, most of the data describing noncommunicable comorbidities among PWH in the region have come from cross-sectional studies that do not report prospective outcomes, such as medication uptake after diagnosis, subsequent healthcare utilization, CVD incidence, or mortality. To address this knowledge gap, the purpose of this study was to describe six-month prospective outcomes including disease control, medication use, and healthcare utilization among Tanzanian adults with HIV and elevated blood pressure or hyperglycemia under current care models. Our primary aim was to determine the proportion of PWH who, after referral for further care for hyperglycemia

or elevated blood pressure within the current siloed system, had persistent hyperglycemia or elevated blood pressure six months later. Since noncommunicable disease screening and care is not currently part of the national HIV treatment protocols in Tanzania, understanding healthcare utilization and outcomes among this population could have important implications for policy-making and clinical care guidelines [17].

## Materials and methods

### Study setting

This prospective observational cohort study was conducted in the Kilimanjaro Region of Tanzania, where the local prevalence of HIV, hypertension, and diabetes mellitus among the general adult population is 3%, 28%, and 6%, respectively [18–20]. Participant enrolment was conducted at the Majengo Care and Treatment Centre (MCTC), a government-funded outpatient HIV clinic that cares for approximately 1200 adults (800 women and 400 men aged  $\geq 18$  years). In general patients can establish care at MCTC either through external referral or self-referral. MCTC is located in an urban setting within the city of Moshi and serves clients both from within the city and from surrounding rural districts. At the time of this study, HIV-related care, such as antiretroviral therapy and HIV-related laboratory testing, was free to all MCTC patients, but noncommunicable disease screening and care was not provided as part of routine care. Under current protocols, MCTC patients attend follow-up appointments every 1 to 6 months, depending on how well-controlled their HIV infection is. MCTC operates three days per week (Monday, Wednesday, and Thursday), and recruitment was conducted during all clinic days. Clinical care at MCTC is typically provided by two clinical officers or physicians. Daily patient volumes at MCTC vary, but the clinic typically sees approximately 15–20 patients per day.

### Participant recruitment

Any adult (age  $\geq 18$  years) presenting to MCTC for HIV care was eligible for enrolment; there were no exclusion criteria. Trained research assistants approached consecutive adult MCTC patients to offer enrolment, which was conducted over a six-month period between September 1st, 2020, and March 1st, 2021. Although all MCTC patients consenting to participation were enrolled in the parent study [15, 21], only those who were found to have elevated blood pressure or hyperglycemia at time of enrolment were included in the present analysis, as detailed below.

### Study procedures

Initial study procedures have been described in detail elsewhere and are summarized here [15, 21, 22]. Enrolment and data collection were conducted by three research assistants, each with over a decade of experience conducting clinical research. Research assistants had either a bachelor's degree or diploma in clinical medicine and underwent two weeks of dedicated training on study procedures prior to study commencement. Research assistants were not members of the MCTC staff. At time of enrolment, research assistants administered a standardized health questionnaire in Swahili to all participants [21]. This questionnaire, based on the World Health Organization (WHO) STEPS survey for noncommunicable disease [23], elicited socio-demographic information as well as information about personal medical history, medication use, and lifestyle behaviors [23]. The study questionnaire was typically administered while the patient was waiting to see the MCTC provider. Participant weight and height were also measured by the research assistants at time of enrolment. Information about HIV care history,

including time since diagnosis, antiretroviral therapy, most recent CD4 count, and most recent HIV viral load, were collected directly from participants' medical records.

Under current care protocols, HIV viral load and CD4 count are typically performed at least annually for MCTC patients in the MCTC lab. In some cases, no CD4 count or HIV viral load from within the past year were available in the medical record, typically because a patient had only recently established care at MCTC or because they had missed their appointment for bloodwork. In these cases where no CD4 count or HIV viral load were available in the medical record, a blood sample was collected by a research clinical officer for these assays during the patient's six-month follow-up visit (described below). When CD4 count and viral load testing were performed by the study team, these assays were conducted at the Kilimanjaro Christian Research Institute Biotechnology Laboratory, using the BD FACSCount (Beckton Dickinson and Company, Franklin Lakes, New Jersey) and Abbott m2000 rt (Abbott Laboratories, Abbott Park, Illinois), respectively.

At enrolment, a resting twelve-lead electrocardiogram (ECG) was also obtained for all participants using the tablet-based PADECG (Edan Instruments, Shenzhen, China). At time of initial enrolment, the research assistants measured participant blood pressure, following American Heart Association/American College of Cardiology guidelines: blood pressure was measured with participant seated and arm at heart level, using an appropriately sized cuff, after participants had rested for about five minutes [24]. The Beurer BM40 automatic blood pressure monitor (Beurer, Ulm, Germany), was used for all blood pressure measurements. Research assistants also obtained a blood glucose level from all participants at time of enrolment, using a point-of-care glucometer (GlucoPlus Blood Glucose Monitoring System, GlucoPlus, Montreal, Canada). Participants were also asked whether they had consumed anything other than water on day of enrolment to ascertain whether the measured glucose result represented a random or fasting glucose level. Any participant with an elevated blood pressure or hyperglycemia (as defined below) was informed of the abnormal result and referred by MCTC staff to an adjacent general medical clinic, as per usual care; an MCTC nurse and physician was also immediately informed if any participant was noted to have elevated blood pressure or hyperglycemia for purposes of notification and referral. The general medical clinic to which patients were referred is a public facility staffed by physicians and clinical officers directly adjacent to MCTC. All clinical data obtained during the course of the study was shared with the clinical team at MCTC.

### Six-month follow-up

Six months after initial enrolment, participants were asked to return to MCTC for a follow-up study visit. Although no compensation was provided to participants at initial enrolment, reimbursement for transportation was provided (5000 Tanzanian shillings or approximately 2 USD) during the follow-up visit. Follow-up study visits were scheduled to coincide with routine clinic return visits to minimize any inconvenience for participants. Follow-up visits were conducted from March 1<sup>st</sup> 2021 through September 1<sup>st</sup> 2021. Follow-up surveys and data collection were performed by the same team of research assistants. At follow-up, participants underwent repeat blood pressure measurement, point-of-care glucose assay, and resting 12-lead ECG testing. They also completed a survey about new medication use and any interim unscheduled healthcare visits for chest pain, shortness of breath, hypertension, or diabetes. Participants were also asked if they were interested in more education about noncommunicable diseases. Finally, participants were asked if they would prefer to receive their noncommunicable disease care at their HIV clinic or in another facility. Participants with elevated blood pressure or hyperglycemia at follow-up were again referred to the adjacent medical clinic for further care.

## ECG interpretation

All ECGs were interpreted by two independent physician adjudicators, trained in either cardiology or emergency medicine. Adjudicators were blinded to all clinical data other than age and sex. Adjudicators were asked to determine presence of prior myocardial infarction and myocardial ischemia according to Fourth Universal Definition of Myocardial Infarction guidelines: prior myocardial infarction was defined as pathologic Q waves in  $\geq 2$  contiguous leads and myocardial ischemia was defined as T-wave inversions or ST-segment depressions in  $\geq 2$  contiguous leads [25]. In cases of disagreement, a third physician adjudicator served as the tiebreaker.

## Study definitions

Elevated blood pressure was defined as measured systolic blood pressure  $\geq 140$  mmHg or measured diastolic blood pressure  $\geq 90$  mmHg, corresponding to the threshold for Stage II Hypertension as per American Heart Association/American College of Cardiology guidelines [24]. Notably, these guidelines call for two separate blood pressure readings on two separate occasions to diagnose hypertension; due to the compressed timeline of this pilot study, only a single blood pressure reading was used to define elevated blood pressure in this study. Hyperglycemia was defined as fasting blood glucose  $\geq 126$  mg/dl or random blood glucose  $\geq 200$  mg/dl, as per American Diabetes Association guidelines [26]. Virologic suppression was defined as most recent HIV RNA viral load  $< 200$  copies/ml. Sedentary lifestyle was defined as participant self-report of  $< 150$  minutes of moderately vigorous exercise per week and active lifestyle was defined by self-report of  $\geq 150$  minutes of moderately vigorous exercise per week, in accordance with WHO guidelines [27]. Medical co-morbidities, tobacco use, alcohol use, and fruit and vegetable consumption were also defined by participant self-report. Medication use at enrolment and follow-up was determined by participant self-report. Cases of interim myocardial infarction were defined as cases where pathologic Q waves consistent with prior MI were found on the 6-month follow-up ECG but not the initial ECG at enrolment. Similarly, cases of interim myocardial ischemia were defined as cases where pathologic T-wave inversions or ST-segment depressions consistent with myocardial ischemia were found on the 6-month follow-up ECG but not the initial ECG at enrolment. The primary outcomes of the study were blood pressure or glycemic control, defined as BP  $< 140/90$  or fasting glucose  $< 126$  or random glucose  $< 200$ .

## Statistical approach

This was a purely descriptive study. For the present study, only participants meeting criteria for elevated blood pressure or hyperglycemia at initial enrolment were included in the analysis. All statistical analyses were performed in the R Suite [28]. Descriptive statistics were used to describe participant characteristics, blood pressure control, and glycemic control at baseline and six-month follow-up. Continuous variables are presented as medians and interquartile ranges (IQR) and categorical variables are presented as proportions. Body mass index (BMI) was calculated directly from measured weight and height. The sample size calculations for the parent study have been previously described [22].

## Ethics

All participants provided written informed consent prior to enrolment. This study received approval from ethical review committees at the Tanzania National Institute for Medical Research, Kilimanjaro Christian Medical Centre, and Duke Health.

## Results

Of 501 MCTC patients approached for study inclusion, 500 (99.8%) consented to participate and were enrolled. Of these, 163 participants were included in the present analysis, including 146 (89.6%) participants with elevated blood pressure alone, 8 (4.9%) participants with hyperglycemia alone, and 9 (5.5%) participants with both elevated blood pressure and hyperglycemia (Fig 1). This resulted in N = 155 participants with baseline elevated blood pressure and N = 17 participants with baseline hyperglycemia.

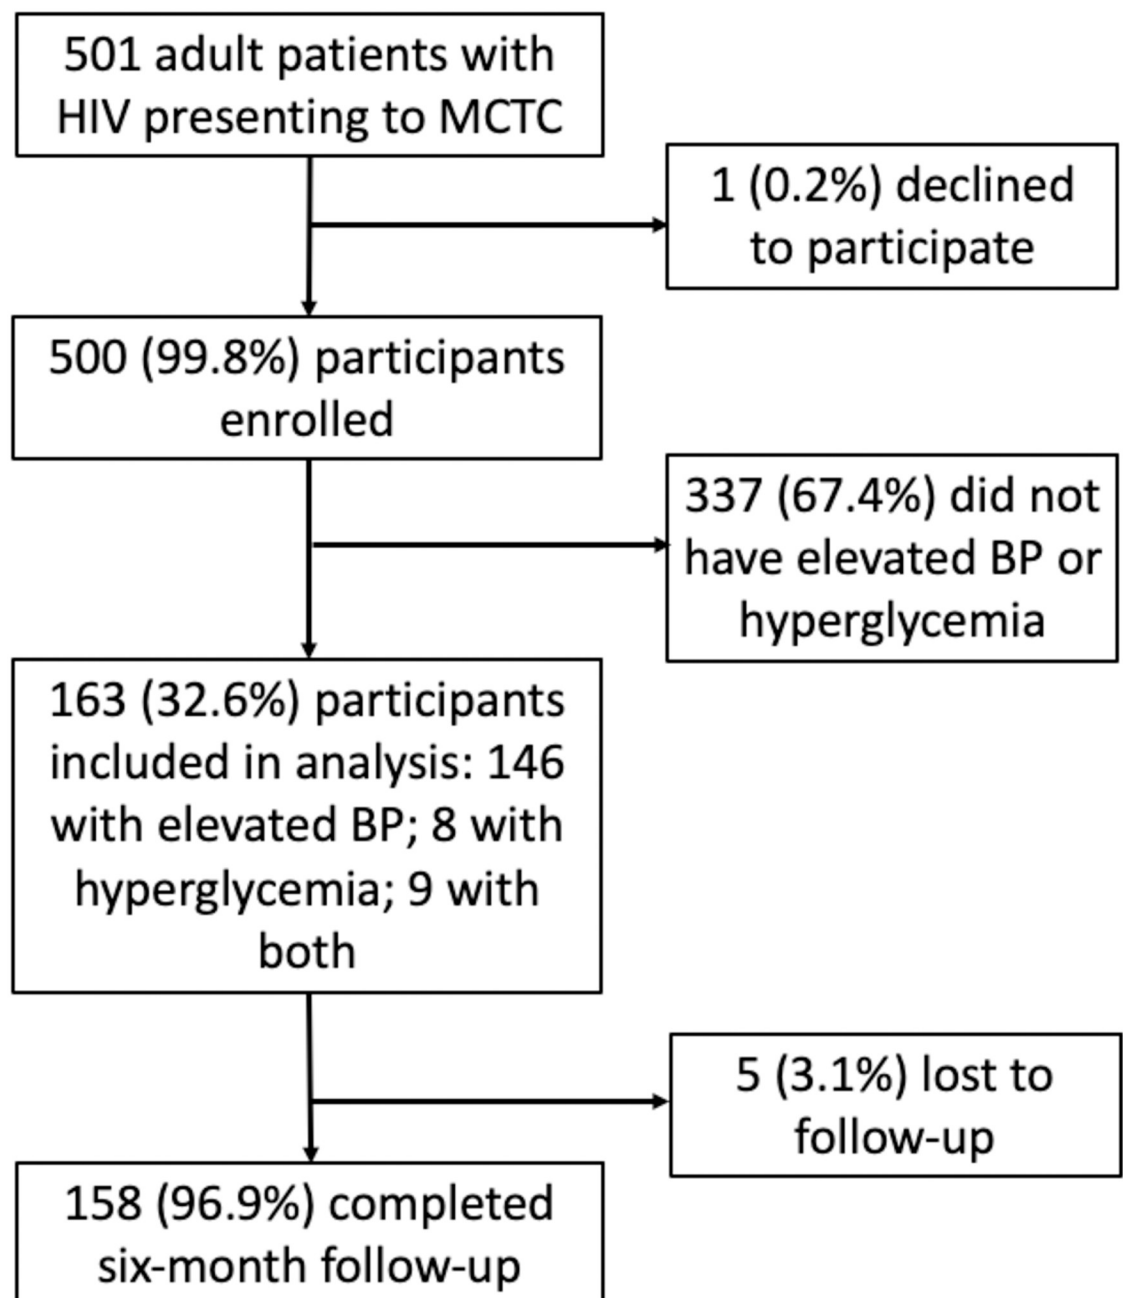

Fig 1. Study participant flow diagram, from recruitment through follow-up.

<https://doi.org/10.1371/journal.pone.0285472.g001>

Of note, 18 enrolled patients (3.6%) reported a history of hypertension but had well-controlled blood pressure (<140/90 mmHg) at enrolment and 4 (0.8%) participants reported a history of diabetes but did not have hyperglycemia at enrolment. These participants were excluded from the present analysis and are described elsewhere [15].

The baseline characteristics of participants with elevated blood pressure and hyperglycemia are summarized in Tables 1 and 2, respectively. Approximately three-quarters of participants with elevated blood pressure or hyperglycemia were female, consistent with the general MCTC clinic patient population. The median (IQR) age of participants with elevated blood pressure was 50 (44, 57) years, and the median (IQR) age of participants with hyperglycemia was 52 (46, 57) years. Few participants reported having health insurance. Of participants with elevated blood pressure, 39 (25.2%) reported a known history of hypertension and 3 (1.9%) reported current use of any anti-hypertensive medication. Of participants with hyperglycemia, 5 (29%) reported a known history of diabetes mellitus, and 2 (12%) reported current use of any anti-hyperglycemic medication.

Six months after enrolment, 5 (3.1%) participants were lost to follow-up, including 4 participants with elevated blood pressure and one participant with hyperglycemia. This resulted in 151 participants with baseline elevated blood pressure completing six-month follow-up and 16 participants with baseline hyperglycemia completing six-month follow-up. The six-month outcomes of participants with elevated blood pressure are presented in Table 3. Among 151 participants with baseline elevated blood pressure completing six-month follow-up, 100 (66.2%) participants had persistently elevated blood pressure, and 7 (4.6%) reported current use of an anti-hypertensive medication (Fig 2a). In the intervening six months, 28 (18.5%) participants reported an unscheduled healthcare encounter for chest pain, shortness of breath, or hypertension, 12 (7.9%) developed interval ECG findings of prior myocardial infarction, and 13 (8.6%) developed interval ECG findings of myocardial ischemia. The vast majority of participants with elevated blood pressure wanted more education about noncommunicable disease ( $n = 149$ , 98.7%) and preferred to receive their hypertension care at their HIV clinic ( $n = 114$ , 75.5%). Agreement among physician adjudicators regarding the presence of ischemia was strong (95.2% agreement,  $\kappa = 0.818$ ).

The six-month outcomes of participants with hyperglycemia are presented in Table 3. Among 16 participants with hyperglycemia completing six-month follow-up, 9 (56%) participants had persistent hyperglycemia and 2 (13%) reported current use of an anti-hyperglycemic medication (Fig 2b). Four (25%) reported an unscheduled healthcare encounter for chest pain, shortness of breath, or hyperglycemia over the prior six months. No participant had interval development of ECG findings of myocardial infarction or myocardial ischemia.

## Discussion

To our knowledge this is one of the first studies to report prospective outcomes of PWH with elevated blood pressure or hyperglycemia in SSA. As advancements in HIV care have led to increased life-expectancy for PWH in SSA, there has been an increase in the burden of age-related, NCDs among this population [6–8, 29]. In our study, few patients with elevated blood pressure or hyperglycemia reported a history of hypertension or diabetes diagnosis at time of enrolment, likely due to low levels of NCD screening and awareness in this population [21, 27]. At 6-month follow-up, the majority of participants did not achieve adequate blood pressure or glycemic control, and uptake of anti-hypertensive or anti-hyperglycemic medications during the follow-up period was low. Of further concern, we observed a large number of NCD-related healthcare visits over the six-month follow-up period and ischemic ECG changes among 10% of participants with elevated blood pressure. Overall, these findings demonstrate the need to improve current care pathways for NCDs among PWH in Tanzania.

**Table 1. Baseline characteristics of HIV-infected adults with elevated blood pressure, northern Tanzania, 2020–2021 (N = 155).**

| Continuous variables                              | median | (IQR)        |
|---------------------------------------------------|--------|--------------|
| Age, years                                        | 50     | (44, 57)     |
| Body mass index, kg/m <sup>2</sup>                | 27.6   | (23.7, 31.0) |
| Systolic blood pressure, mmHg                     | 151    | (143, 167)   |
| Diastolic blood pressure, mmHg                    | 94     | (89, 99)     |
| Categorical variables                             | n      | (%)          |
| Sex                                               |        |              |
| Male                                              | 40     | (25.8%)      |
| Female                                            | 115    | (74.2%)      |
| Highest formal education level                    |        |              |
| None                                              | 9      | (5.8%)       |
| Primary school                                    | 116    | (74.8%)      |
| Secondary school                                  | 23     | (14.8%)      |
| University                                        | 7      | (4.5%)       |
| Health insurance                                  |        |              |
| Has health insurance                              | 17     | (11.0%)      |
| Does not have health insurance                    | 138    | (89.0%)      |
| Tobacco use                                       |        |              |
| Current tobacco use                               | 6      | (3.9%)       |
| Does not use tobacco products                     | 149    | (96.1%)      |
| Alcohol use                                       |        |              |
| Current alcohol use                               | 77     | (49.7%)      |
| Does not drink alcohol                            | 78     | (50.3%)      |
| Vegetable consumption                             |        |              |
| Eats vegetables daily                             | 36     | (23.2%)      |
| Does not eat vegetables daily                     | 119    | (76.8%)      |
| Fruit consumption                                 |        |              |
| Eats fruits daily                                 | 31     | (20.0%)      |
| Does not eat fruits daily                         | 124    | (80.0%)      |
| Physical activity                                 |        |              |
| Active lifestyle                                  | 104    | (67.1%)      |
| Sedentary lifestyle                               | 51     | (32.9%)      |
| Known history of hypertension                     |        |              |
| Self-reported history of hypertension             | 39     | (25.2%)      |
| No self-reported history of hypertension          | 116    | (74.8%)      |
| Anti-hypertensive medication use                  |        |              |
| Current use of anti-hypertensive medication       | 3      | (1.9%)       |
| No current use                                    | 152    | (98.1%)      |
| Hypertension type                                 |        |              |
| Isolated systolic hypertension ( $\geq 140$ mmHg) | 44     | (28.4%)      |
| Isolated diastolic hypertension ( $\geq 90$ mmHg) | 25     | (16.1%)      |
| Combined systolic and diastolic hypertension      | 86     | (55.5%)      |
| Current anti-retroviral therapy                   |        |              |
| TDF/lamivudine/dolutegravir                       | 146    | (94.2%)      |
| TDF/lamivudine/efavirenz                          | 4      | (2.6%)       |
| Other                                             | 5      | (3.2%)       |

TDF: Tenofovir disoproxil fumarate

<https://doi.org/10.1371/journal.pone.0285472.t001>



**Table 2. Baseline characteristics of HIV-infected adults with hyperglycemia, northern Tanzania, 2020–2021 (N = 17).**

| Continuous variables                       | median | (IQR)        |
|--------------------------------------------|--------|--------------|
| Age, years                                 | 52     | (46, 57)     |
| Body mass index, kg/m <sup>2</sup>         | 26.7   | (24.6, 30.5) |
| Fasting glucose, mg/dl (N = 8)             | 2447   | (195, 259)   |
| Random glucose, mg/dl (N = 9)              | 304    | (266, 335)   |
| Categorical variables                      | n      | (%)          |
| Sex                                        |        |              |
| Male                                       | 3      | (18%)        |
| Female                                     | 14     | (82%)        |
| Highest formal education level             |        |              |
| None                                       | 1      | (6%)         |
| Primary school                             | 13     | (76%)        |
| Secondary school                           | 3      | (18%)        |
| Health insurance                           |        |              |
| Has health insurance                       | 2      | (12%)        |
| Does not have health insurance             | 15     | (88%)        |
| Tobacco use                                |        |              |
| Current tobacco use                        | 0      | (0%)         |
| Does not use tobacco products              | 17     | (100%)       |
| Alcohol use                                |        |              |
| Current alcohol use                        | 10     | (59%)        |
| Does not drink alcohol                     | 7      | (41%)        |
| Vegetable consumption                      |        |              |
| Eats vegetables daily                      | 6      | (35%)        |
| Does not eat vegetables daily              | 11     | (65%)        |
| Fruit consumption                          |        |              |
| Eats fruits daily                          | 6      | (35%)        |
| Does not eat fruits daily                  | 11     | (65%)        |
| Physical activity                          |        |              |
| Active lifestyle                           | 9      | (53%)        |
| Sedentary lifestyle                        | 8      | (47%)        |
| Known history of diabetes                  |        |              |
| Self-reported history of diabetes          | 5      | (29%)        |
| No self-reported history of diabetes       | 12     | (71%)        |
| Anti-hyperglycemic medication use          |        |              |
| Current use of anti-hyperglycemic medicine | 2      | (12%)        |
| No current use                             | 15     | (88%)        |
| Current anti-retroviral therapy            |        |              |
| TDF/lamivudine/dolutegravir                | 13     | (76.5%)      |
| TDF/lamivudine/efavirenz                   | 2      | (11.8%)      |
| Other                                      | 2      | (11.8%)      |

TDF: Tenofovir disoproxil fumarate

<https://doi.org/10.1371/journal.pone.0285472.t002>

At 6-month follow-up, most participants with elevated blood pressure or hyperglycemia did not achieve guideline-recommended blood pressure or glycemic targets. These low rates of NCD control are likely due, at least in part, to the observed low uptake of anti-hypertensive or anti-hyperglycemic medications among participants. Further study is needed to explore

**Table 3. Six-month outcomes of HIV-infected adults with elevated blood pressure (N = 151<sup>a</sup>) or with hyperglycemia (N = 16<sup>a</sup>), northern Tanzania, 2021.**

| Health Status                                              | Six-month outcome                                                                      | n   | (%)    |
|------------------------------------------------------------|----------------------------------------------------------------------------------------|-----|--------|
| HIV-infected adults with elevated blood pressure (N = 151) | Persistently elevated blood pressure                                                   | 100 | (66.2) |
|                                                            | Unscheduled healthcare encounter for chest pain, shortness of breath, or hypertension  | 28  | (18.5) |
|                                                            | Current use of anti-hypertensive medication                                            | 7   | (4.6)  |
|                                                            | Interim ECG changes                                                                    |     |        |
|                                                            | Interim myocardial infarction on ECG                                                   | 12  | (7.9)  |
|                                                            | Interim myocardial ischemia on ECG                                                     | 13  | (8.6)  |
|                                                            | Would like more education about noncommunicable disease                                | 149 | (98.7) |
|                                                            | Would prefer to receive noncommunicable disease care at the HIV clinic                 | 114 | (75.5) |
| HIV-infected adults with hyperglycemia (N = 16)            | Persistent hyperglycemia                                                               | 9   | (56)   |
|                                                            | Unscheduled healthcare encounter for chest pain, shortness of breath, or hyperglycemia | 4   | (25)   |
|                                                            | Current use of anti-hyperglycemic medication                                           | 2   | (13)   |
|                                                            | Interim ECG changes                                                                    |     |        |
|                                                            | Interim myocardial infarction on ECG                                                   | 0   | (0)    |
|                                                            | Interim myocardial ischemia on ECG                                                     | 0   | (0)    |
|                                                            | Would like more education about noncommunicable disease                                | 15  | (94)   |
|                                                            | Would prefer to receive noncommunicable disease care at the HIV clinic                 | 11  | (69)   |

ECG: electrocardiogram

<sup>a</sup> Denominators exclude 4 participants with baseline elevated blood pressure who were lost to follow-up and 1 participant with baseline hyperglycemia who was lost to follow-up. Nine participants with both baseline elevated blood pressure and baseline hyperglycemia were included in both sections of [Table 3](#).

<https://doi.org/10.1371/journal.pone.0285472.t003>

reasons for low uptake of these medications, since all participants were referred to an adjacent general practitioner if they were found to have elevated blood pressure or hyperglycemia at initial enrolment. Recent qualitative studies have identified multiple barriers to anti-hypertensive and anti-hyperglycemic therapies among PWH in Tanzania, including fear, lack of understanding, and cost [30, 31]. In contrast to antiretroviral therapies, anti-hypertensive and anti-hyperglycemic medications are not provided free-of-charge in Tanzania. As the vast majority of our participants did not report health insurance coverage, out-of-pocket medication costs may have been a barrier to NCD medication uptake in our study [32, 33]. Additional study is needed to further identify and explore barriers to hypertension and diabetes control among PWH in Tanzania. Regardless, the fact that so many participants in our study who were referred to a separate facility for management of elevated blood pressure or hyperglycemia had persistently uncontrolled blood pressure and hyperglycemia six months later demonstrates that existing siloed care pathways are insufficient to provide optimal control of NCD comorbidities in this population. Currently, there are scant comparative data describing prospective NCD outcomes among PWH in SSA. In the SEARCH trial in Uganda, which evaluated an integrated HIV and hypertension clinic model, 48% of PWH and hypertension achieved blood pressure control at 1 year [34], more than the 34% of participants who achieved blood pressure control at 6 months in our study. Additional study is needed to describe prospective NCD outcomes among PWH in SSA and develop interventions to improve NCD control in this population.

Beyond low rates of NCD control, we also observed frequent healthcare utilization in our cohort: roughly one in five participants reported an unscheduled visit to a healthcare facility for chest pain, shortness of breath, or hyperglycemia. This finding suggests that there may be substantial cost benefits, at the individual and system levels, to improving NCD control among this high-risk population. Of further concern, we found that more than one in ten participants

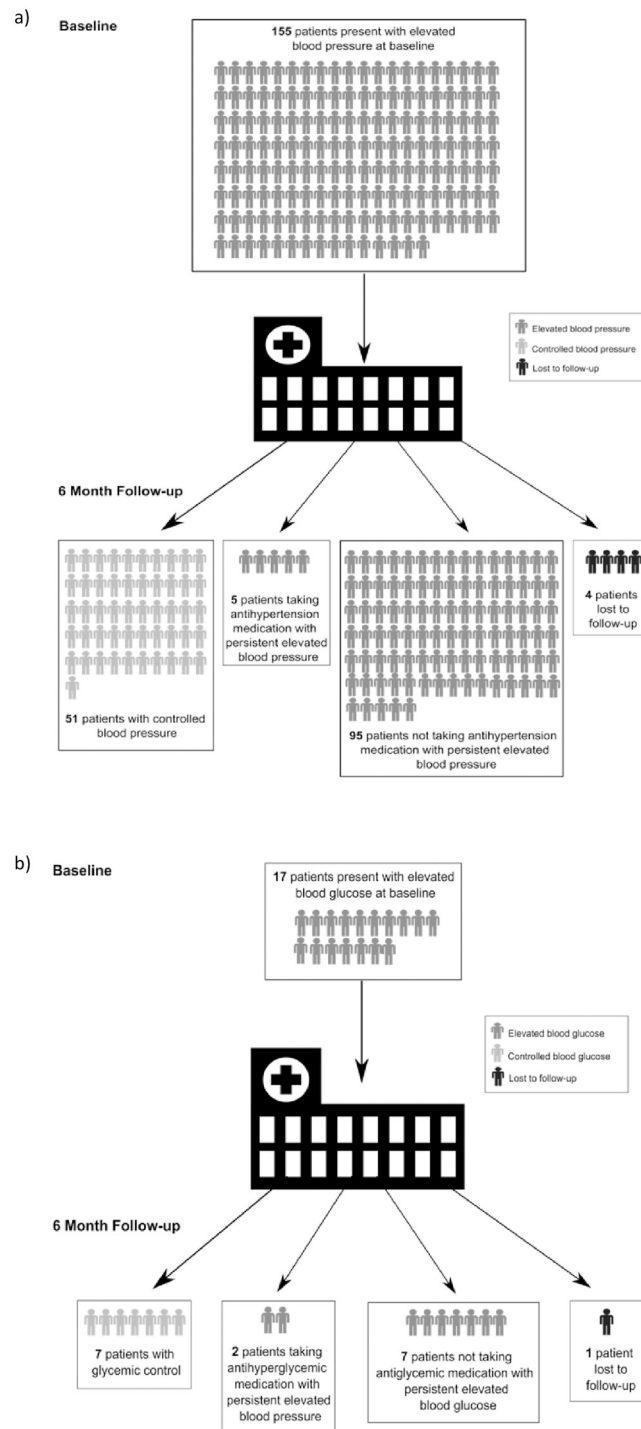

**Fig 2. 6-month outcomes among patients a) with elevated blood pressure and b) with hyperglycemia presenting to MCTC for HIV care in northern Tanzania.**

<https://doi.org/10.1371/journal.pone.0285472.g002>

with elevated blood pressure developed new ECG changes suggestive of myocardial infarction or myocardial ischemia within 6 months of enrolment. Although ECG findings of Q waves and T-wave inversions are non-specific and may indicate a wide array of pathologies including cardiomyopathies, structural heart disease, and coronary ischemia [35, 36], the presence of

these interim ischemic ECG changes is notable and suggests that end-organ damage may be occurring among Tanzanians with HIV and poorly-controlled hypertension over a relatively short six-month period. Indeed, ischemic ECG findings like Q waves are strongly predictive of future myocardial infarction and death [37], and so these findings underscore the need for better NCD control to prevent future cardiovascular events in this high-risk population.

There was a strong desire for more NCD education among our participants, and most expressed a preference for receiving NCD care at the HIV clinic. In recent years, many public health experts have advocated for an integrated healthcare model in SSA: providing NCD and HIV care at one clinic [16, 37–39]. The integrated care model has been piloted in a variety of SSA settings and has been shown to be both feasible and well accepted by patients [16, 40–43]. Although rigorous cost-effectiveness data remains scarce, recent studies in Uganda and Tanzania found that integration of HIV and NCD care may be substantially more cost-effective than siloed care [44–46]. However, the effect of integration on NCD control remains unclear, with many studies demonstrating minimal or no increase in the proportion of patients achieving blood pressure control when compared to usual care [16, 40–42, 47]. In Tanzania, where integrated NCD care is not routinely provided alongside HIV care, additional study is needed to identify best practices for maximizing NCD control among PWH in a cost-effective fashion [48].

This study had multiple limitations. Because we only enrolled patients who were already engaged in HIV care, our findings may not be generalizable to PWH who are not engaged in care or are unaware of their HIV status. Patients not engaged in care are likely to have even lower rates of NCD control. Secondly, we relied on random glucose measurements to identify patients with potential diabetes mellitus due to cost restraints. Hemoglobin A1c levels would likely have provided a more accurate measure of the prevalence and control of diabetes mellitus among participants, although hemoglobin A1c may be less accurate in those with HIV [49]. Furthermore, we measured blood pressure on only two occasions, separated by 6 months. Continuous ambulatory blood pressure monitoring would have provided a more comprehensive description of blood pressure control among participants. Because blood pressure is highly variable and may be transiently elevated due to white coat hypertension or other factors, we may have included participants without true underlying hypertension [50]. The term “elevated blood pressure” was used to describe our participants to indicate that they had not met the formal diagnostic criteria for hypertension. Moreover, the use of a single blood pressure screening to identify patients with elevated blood pressure likely resulted in exclusion of patients with hypertension who for various reasons had transiently depressed blood pressure at time of screening; screening for elevated blood pressure over multiple occasions would likely have identified additional participants with elevated blood pressure. We also relied on participant self-report for medication use, which could have led to under- or over-reporting of medication uptake due to recall bias and social desirability bias. Additionally, we excluded a handful of patients who reported a history of hypertension or diabetes but did not have elevated blood pressure or hyperglycemia at enrolment. Although there were few such patients, exclusion of these patients likely resulted in an under-estimation of the effectiveness of current care pathways in controlling comorbid hypertension and diabetes. Another limitation of our study is that we did not observe care of referred patients at the outside medical clinic or investigate participants’ reasons for not taking antihypertensive or antihyperglycemic medications at follow-up; such data would have shed further light on reasons for poor blood pressure and glycemic control in our study population. Finally, we used ECG changes including new T-wave inversions, new ST-segment depressions, and new pathologic Q waves as a measure of interim myocardial ischemia or infarction, but these findings are non-specific and may be seen in other conditions such as pulmonary embolism and non-ischemic cardiomyopathies [48, 51, 52].

In conclusion, among Tanzanians with HIV and comorbid elevated blood pressure and hyperglycemia at a single center, most had not achieved adequate blood pressure or blood glucose control, and most were not taking any anti-hypertensive or anti-hyperglycemic medications six months after initial screening. Importantly, because we do not know whether these participants received a formal diagnosis of hypertension or diabetes or whether they were prescribed any medications, the reasons for their persistently elevated blood pressure or their persistent hyperglycemia are unclear and warrant further exploration. There was a strong desire among patients for more NCD education, and there is an urgent need to develop locally tailored interventions to improve NCD care pathways among PWH in Tanzania.

## Supporting information

### S1 Dataset.

(XLSX)

### S1 File. Inclusivity in global research.

(DOCX)

## Author Contributions

**Conceptualization:** Francis M. Sakita, Jordan Chick, Dorothy Samuel, Alexander T. Limkakeng, Kajiru G. Kilonzo, Nathan M. Thielman, Gloria Temu, Julian T. Hertz.

**Data curation:** Linda P. Samu, Amedeus V. Maro.

**Formal analysis:** Francis M. Sakita, Sainikitha Prattipati, Jordan Chick, Linda P. Samu, Amedeus V. Maro, Lauren Coaxum, Sophie W. Galson.

**Funding acquisition:** Julian T. Hertz.

**Investigation:** Linda P. Samu.

**Project administration:** Francis M. Sakita, Sainikitha Prattipati, Amedeus V. Maro, Julian T. Hertz.

**Resources:** Francis M. Sakita, Julian T. Hertz.

**Supervision:** Francis M. Sakita, Sainikitha Prattipati, Jordan Chick, Julian T. Hertz.

**Visualization:** Paige R. O'Leary.

**Writing – original draft:** Lauren Coaxum, Sophie W. Galson, Paige R. O'Leary.

**Writing – review & editing:** Francis M. Sakita, Sainikitha Prattipati, Jordan Chick, Linda P. Samu, Amedeus V. Maro, Lauren Coaxum, Sophie W. Galson, Dorothy Samuel, Alexander T. Limkakeng, Paige R. O'Leary, Kajiru G. Kilonzo, Nathan M. Thielman, Gloria Temu, Julian T. Hertz.

## References

1. Stanaway JD, Afshin A, Gakidou E, Lim SS, Abate D, Abate KH, et al. Global, regional, and national comparative risk assessment of 84 behavioural, environmental and occupational, and metabolic risks or clusters of risks for 195 countries and territories, 1990–2017: a systematic analysis for the Global Burden of Disease Study. *The Lancet*. 2018; 392(10159):1923–94. [https://doi.org/10.1016/s0140-6736\(18\)32225-6](https://doi.org/10.1016/s0140-6736(18)32225-6) PMID: 30496105
2. Yusuf S, Joseph P, Rangarajan S, Islam S, Mente A, Hystad P, et al. Modifiable risk factors, cardiovascular disease, and mortality in 155 722 individuals from 21 high-income, middle-income, and low-income countries (PURE): a prospective cohort study. *The Lancet*. 2020; 395(10226):795–808. [https://doi.org/10.1016/s0140-6736\(19\)32008-2](https://doi.org/10.1016/s0140-6736(19)32008-2) PMID: 31492503

3. Shah ASV, Stelzle D, Lee KK, Beck EJ, Alam S, Clifford S, et al. Global Burden of Atherosclerotic Cardiovascular Disease in People Living With HIV. *Circulation*. 2018; 138(11):1100–12. <https://doi.org/10.1161/circulationaha.117.033369>
4. Cysique LA, Brew BJ. Vascular cognitive impairment and HIV-associated neurocognitive disorder: a new paradigm. *Journal of NeuroVirology*. 2019; 25(5):710–21. <https://doi.org/10.1007/s13365-018-0706-5> PMID: 30635846
5. Feinstein MJ, Hsue PY, Benjamin LA, Bloomfield GS, Currier JS, Freiberg MS, et al. Characteristics, Prevention, and Management of Cardiovascular Disease in People Living With HIV: A Scientific Statement From the American Heart Association. *Circulation*. 2019; 140(2). <https://doi.org/10.1161/CIR.0000000000000695> PMID: 31154814
6. Hontelez JAC, De Vlas SJ, Baltussen R, Newell M-L, Bakker R, Tanser F, et al. The impact of antiretroviral treatment on the age composition of the HIV epidemic in sub-Saharan Africa. *AIDS*. 2012; 26(Supplement S1):S19–S30. <https://doi.org/10.1097/qad.0b013e3283558526> PMID: 22781175
7. Brennan AT, Jamieson L, Crowther NJ, Fox MP, George JA, Berry KM, et al. Prevalence, incidence, predictors, treatment, and control of hypertension among HIV-positive adults on antiretroviral treatment in public sector treatment programs in South Africa. *PLOS ONE*. 2018; 13(10):e0204020. <https://doi.org/10.1371/journal.pone.0204020> PMID: 30281618
8. Mathabire Rücker SC, Tayea A, Bitilinyu-Bangoh J, Bermúdez-Aza EH, Salumu L, Quiles IA, et al. High rates of hypertension, diabetes, elevated low-density lipoprotein cholesterol, and cardiovascular disease risk factors in HIV-infected patients in Malawi. *AIDS*. 2018; 32(2):253–60. <https://doi.org/10.1097/QAD.0000000000001700> PMID: 29135581
9. Fiseha T, Belete AG, Dereje H, Dires A. Hypertension in HIV-Infected Patients Receiving Antiretroviral Therapy in Northeast Ethiopia. *Int J Hypertens*. 2019; 2019:4103604. Epub 2020/01/14. <https://doi.org/10.1155/2019/4103604> PMID: 31929895.
10. Juma K, Nyabera R, Mbugua S, Odinya G, Jowi J, Ngunga M, et al. Cardiovascular risk factors among people living with HIV in rural Kenya: a clinic-based study. *Cardiovasc J Afr*. 2019; 30(1):52–6. Epub 2019/02/06. <https://doi.org/10.5830/CVJA-2018-064> PMID: 30720846.
11. Manavalan P, Madut DB, Hertz JT, Thielman NM, Okeke NL, Mmbaga BT, et al. Hypertension burden and challenges across the hypertension treatment cascade among adults enrolled in HIV care in northern Tanzania. *J Clin Hypertens (Greenwich)*. 2020; 22(8):1518–22. Epub 2020/07/12. <https://doi.org/10.1111/jch.13929> PMID: 32652868.
12. Abebe SM, Getachew A, Fasika S, Bayisa M, Girma Demisse A, Mesfin N. Diabetes mellitus among HIV-infected individuals in follow-up care at University of Gondar Hospital, Northwest Ethiopia. *BMJ Open*. 2016; 6(8):e011175. <https://doi.org/10.1136/bmjopen-2016-011175> PMID: 27540099
13. Maganga E, Smart LR, Kalluvya S, Kataraihya JB, Saleh AM, Obeid L, et al. Glucose Metabolism Disorders, HIV and Antiretroviral Therapy among Tanzanian Adults. *PLoS One*. 2015; 10(8):e0134410. Epub 2015/08/20. <https://doi.org/10.1371/journal.pone.0134410> PMID: 26287742.
14. Umar DM, Naidoo P. Prevalence and predictors of diabetes mellitus among persons living with HIV: a retrospective cohort study conducted in 4 public healthcare facilities in KwaZulu-Natal. *BMC Public Health*. 2021; 21(1):288. <https://doi.org/10.1186/s12889-021-10318-6> PMID: 33541316
15. Hertz JT, Prattipati S, Kweka GL, Mlangi JJ, Tarimo TG, Mmbaga BT, et al. Prevalence and predictors of uncontrolled hypertension, diabetes, and obesity among adults with HIV in northern Tanzania. *Glob Public Health*. 2022:1–13. Epub 2022/03/15. <https://doi.org/10.1080/17441692.2022.2049344> PMID: 35282776.
16. McCombe G, Lim J, Hout MCV, Lazarus JV, Bachmann M, Jaffar S, et al. Integrating Care for Diabetes and Hypertension with HIV Care in Sub-Saharan Africa: A Scoping Review. *Int J Integr Care*. 2022; 22(1):6. Epub 2022/02/10. <https://doi.org/10.5334/ijic.5839> PMID: 35136387.
17. Ramadhani A, Josiah RM, Rwebembera A, Msuya EL, Swai R, Urassa P, et al. National Guidelines for the Management of HIV and AIDS. Ministry of Health and Social Welfare; 2012.
18. Zanzibar A. Tanzania HIV Impact Survey (THIS) 2016–2017. 2017.
19. Galson SW, Staton CA, Karia F, Kilonzo K, Lunyera J, Patel UD, et al. Epidemiology of hypertension in Northern Tanzania: a community-based mixed-methods study. *BMJ Open*. 2017; 7(11). <https://doi.org/10.1136/bmjopen-2017-018829> PMID: 29127232
20. Stanifer JW, Cleland CR, Makuka GJ, Egger JR, Maro V, Maro H, et al. Prevalence, Risk Factors, and Complications of Diabetes in the Kilimanjaro Region: A Population-Based Study from Tanzania. *PLOS ONE*. 2016; 11(10):e0164428. <https://doi.org/10.1371/journal.pone.0164428> PMID: 27711179
21. Prattipati S, Mlangi JJ, Tarimo TG, Kweka GL, Thielman NM, Bettger JP, et al. Knowledge, attitudes, and preventive practices regarding ischemic heart disease among HIV-positive individuals in northern Tanzania. *Tropical Medicine & International Health*. 2021; 26(12):1652–8. <https://doi.org/10.1111/tmi.13690> PMID: 34637597

22. Prattipati S, Sakita FM, Tarimo TG, Kweka GL, Mlangi JJ, Maro AV, et al. Prevalence and Correlates of Ischemic ECG Findings among Adults With and Without HIV in Tanzania. *Glob Heart*. 2022; 17(1):38. Epub 2022/07/16. <https://doi.org/10.5334/gh.1127> PMID: 35837355.
23. Riley L, Guthold R, Cowan M, Savin S, Bhatti L, Armstrong T, et al. The World Health Organization STEPwise approach to noncommunicable disease risk-factor surveillance: methods, challenges, and opportunities. *American journal of public health*. 2016; 106(1):74–8. <https://doi.org/10.2105/AJPH.2015.302962> PMID: 26696288
24. Whelton PK, Carey RM, Aronow WS, Casey DE, Collins KJ, Dennison Himmelfarb C, et al. 2017 ACC/AHA/AAPA/ABC/ACPM/AGS/APhA/ASH/ASPC/NMA/PCNA Guideline for the Prevention, Detection, Evaluation, and Management of High Blood Pressure in Adults: Executive Summary: A Report of the American College of Cardiology/American Heart Association Task F. *Hypertension*. 2018; 71(6):1269–324. <https://doi.org/10.1161/hyp.000000000000066>
25. Thygesen K, Alpert JS, Jaffe AS, Chaitman BR, Bax JJ, Morrow DA, et al. Fourth Universal Definition of Myocardial Infarction (2018). *Circulation*. 2018; 138(20). <https://doi.org/10.1161/cir.0000000000000617> PMID: 30571511
26. 2. Classification and Diagnosis of Diabetes: Standards of Medical Care in Diabetes—2021. *Diabetes Care*. 2021; 44(Supplement\_1):S15–S33. <https://doi.org/10.2337/dc21-s002> PMID: 33298413
27. World Health Organization t. Global recommendations on physical activity for health: World Health Organization; 2010.
28. Team RC. R: A language and environment for statistical computing. 2013.
29. O'Halloran JA, Sahrman J, Parra-Rodriguez L, Vo DT, Butler AM, Olsen MA, et al. Integrase Strand Transfer Inhibitors are Associated with Incident Diabetes Mellitus in People with HIV. *Clinical infectious diseases: an official publication of the Infectious Diseases Society of America*. 2022. Epub 20220506. <https://doi.org/10.1093/cid/ciac355> PMID: 35521785.
30. Manavalan P, Minja L, Wanda L, Hertz JT, Thielman NM, Okeke NL, et al. “It’s because I think too much”: Perspectives and experiences of adults with hypertension engaged in HIV care in northern Tanzania. *PLOS ONE*. 2020; 15(12):e0243059. <https://doi.org/10.1371/journal.pone.0243059> PMID: 33270765
31. Manavalan P, Wanda L, Galson SW, Thielman NM, Mmbaga BT, Watt MH. Hypertension Care for People With HIV in Tanzania: Provider Perspectives and Opportunities for Improvement. *Journal of the International Association of Providers of AIDS Care (JIAPAC)*. 2021; 20:232595822110523. <https://doi.org/10.1177/23259582211052399> PMID: 34751055
32. Metta E, Msambichaka B, Mwangome M, Nyato DJ, Dieleman M, Haisma H, et al. Public policy, health system, and community actions against illness as platforms for response to NCDs in Tanzania: a narrative review. *Global Health Action*. 2014; 7(1):23439. <https://doi.org/10.3402/gha.v7.23439> PMID: 24848655
33. Mnzava T, Mmari E, Berruti A. Drivers of Patient Costs in Accessing HIV/AIDS Services in Tanzania. *Journal of the International Association of Providers of AIDS Care (JIAPAC)*. 2018; 17:232595821877477. <https://doi.org/10.1177/2325958218774775> PMID: 29770721
34. Kwarisiima D, Atukunda M, Owaraganise A, Chamie G, Clark T, Kabami J, et al. Hypertension control in integrated HIV and chronic disease clinics in Uganda in the SEARCH study. *BMC Public Health*. 2019; 19(1). <https://doi.org/10.1186/s12889-019-6838-6> PMID: 31060545
35. Kaandorp TAM, Bax JJ, Lamb HJ, Viergever EP, Boersma E, Poldermans D, et al. Which parameters on magnetic resonance imaging determine Q waves on the electrocardiogram? *The American journal of cardiology*. 2005; 95(8):925–9. <https://doi.org/10.1016/j.amjcard.2004.12.028> PMID: 15820156
36. Said SA, Bloo R, de Nooijer R, Slootweg A. Cardiac and non-cardiac causes of T-wave inversion in the precordial leads in adult subjects: A Dutch case series and review of the literature. *World J Cardiol*. 2015; 7(2):86–100. <https://doi.org/10.4330/wjc.v7.i2.86> PMID: 25717356.
37. Godsk P, Jensen JS, Abildstrøm SZ, Appleyard M, Pedersen S, Mogelvang R. Prognostic significance of electrocardiographic Q-waves in a low-risk population. *EP Europace*. 2012; 14(7):1012–7. <https://doi.org/10.1093/europace/eur409> PMID: 22277647
38. Barr AL, Young EH, Smeeth L, Newton R, Seeley J, Ripullone K, et al. The need for an integrated approach for chronic disease research and care in Africa. *Global health, epidemiology and genomics*. 2016; 1:1. <https://doi.org/10.1017/gh.2016.16> 2050482896; PMID: 29868211.
39. Atun R, Jaffar S, Nishtar S, Knaul FM, Barreto ML, Nyirenda M, et al. Improving responsiveness of health systems to non-communicable diseases. *The Lancet*. 2013; 381(9867):690–7. [https://doi.org/10.1016/S0140-6736\(13\)60063-X](https://doi.org/10.1016/S0140-6736(13)60063-X) PMID: 23410609
40. Kimera ID, Namugenyi C, Schwartz JI, Musimbaggo DJ, Ssenyonjo R, Atukunda P, et al. Integrated multi-month dispensing of antihypertensive and antiretroviral therapy to sustain hypertension and HIV

- control. *Journal of Human Hypertension*. 2022. <https://doi.org/10.1038/s41371-022-00655-3> PMID: 35246602
41. Birungi J, Kivuyo S, Garrib A, Mugenyi L, Mutungi G, Namakoola I, et al. Integrating health services for HIV infection, diabetes and hypertension in sub-Saharan Africa: a cohort study. *BMJ Open*. 2021; 11(11):e053412. Epub 2021/11/04. <https://doi.org/10.1136/bmjopen-2021-053412> PMID: 34728457.
  42. Gausi B, Berkowitz N, Jacob N, Oni T. Treatment outcomes among adults with HIV/non-communicable disease multimorbidity attending integrated care clubs in Cape Town, South Africa. *AIDS Research and Therapy*. 2021; 18(1). <https://doi.org/10.1186/s12981-021-00387-3> PMID: 34649586
  43. Wroe EB, Kalanga N, Mailosi B, Mwalwanda S, Kachimanga C, Nyangulu K, et al. Leveraging HIV platforms to work toward comprehensive primary care in rural Malawi: the Integrated Chronic Care Clinic. *Healthc (Amst)*. 2015; 3(4):270–6. Epub 2015/12/25. <https://doi.org/10.1016/j.hjdsi.2015.08.002> PMID: 26699356.
  44. Shiri T, Birungi J, Garrib AV, Kivuyo SL, Namakoola I, Mghamba J, et al. Patient and health provider costs of integrated HIV, diabetes and hypertension ambulatory health services in low-income settings—an empirical socio-economic cohort study in Tanzania and Uganda. *BMC Medicine*. 2021; 19(1). <https://doi.org/10.1186/s12916-021-02094-2> PMID: 34503496
  45. Shade SB, Osmand T, Kwarisiima D, Brown LB, Luo A, Mwebaza B, et al. Costs of integrating hypertension care into HIV care in rural East African clinics. *Aids*. 2021; 35(6):911–9. Epub 2021/04/07. <https://doi.org/10.1097/QAD.0000000000002834> PMID: 33821821.
  46. Sando D, Kintu A, Okello S, Kawungezi PC, Guwatudde D, Mutungi G, et al. Cost-effectiveness analysis of integrating screening and treatment of selected non-communicable diseases into HIV/AIDS treatment in Uganda. *Journal of the International AIDS Society*. 2020; 23(S1). <https://doi.org/10.1002/jia2.25507> PMID: 32562364
  47. Rohwer A, Uwimana Nicol J, Toews I, Young T, Bavuma CM, Meerpohl J. Effects of integrated models of care for diabetes and hypertension in low-income and middle-income countries: a systematic review and meta-analysis. *BMJ Open*. 2021; 11(7):e043705. Epub 2021/07/14. <https://doi.org/10.1136/bmjopen-2020-043705> PMID: 34253658.
  48. Shayo EH, Kivuyo S, Seeley J, Bukonya D, Karoli P, Mfinanga SG, et al. The acceptability of integrated healthcare services for HIV and non-communicable diseases: experiences from patients and healthcare workers in Tanzania. *BMC Health Services Research*. 2022; 22(1):655. <https://doi.org/10.1186/s12913-022-08065-4> PMID: 35578274
  49. Diop ME, Bastard JP, Meunier N, Thévenet S, Maachi M, Capeau J, et al. Inappropriately low glycated hemoglobin values and hemolysis in HIV-infected patients. *AIDS Res Hum Retroviruses*. 2006; 22(12):1242–7. Epub 2007/01/11. <https://doi.org/10.1089/aid.2006.22.1242> PMID: 17209766.
  50. Nuredini G, Saunders A, Rajkumar C, Okorie M. Current status of white coat hypertension: where are we? *Ther Adv Cardiovasc Dis*. 2020; 14:1753944720931637. Epub 2020/06/26. <https://doi.org/10.1177/1753944720931637> PMID: 32580646.
  51. Nadour W, Doyle M, Williams RB, Rayarao G, Grant SB, Thompson DV, et al. Does the presence of Q waves on the EKG accurately predict prior myocardial infarction when compared to cardiac magnetic resonance using late gadolinium enhancement? A cross-population study of noninfarct vs infarct patients. *Heart Rhythm*. 2014; 11(11):2018–26. Epub 2014/07/22. <https://doi.org/10.1016/j.hrthm.2014.07.025> PMID: 25063692.
  52. Kaandorp TA, Bax JJ, Lamb HJ, Viergever EP, Boersma E, Poldermans D, et al. Which parameters on magnetic resonance imaging determine Q waves on the electrocardiogram? *The American journal of cardiology*. 2005; 95(8):925–9. Epub 2005/04/12. <https://doi.org/10.1016/j.amjcard.2004.12.028> PMID: 15820156.
